# Supplementary material for: Correlation between Anthropometric and Ultrasound Measurement for Dry Needling of the Iliocostalis Lumborum Muscle with a Safety Protocol: A Cross-Sectional Observational Study
Source: MDPI journal article supplement (doi:10.3390/healthcare10122470), 2022-12-07
Supplement: s1 [file s1]

# Annexes of the study of "Correlation of anthropometric measurements and ultrasound measurements to establish dry needling protocol of the iliocostalis lumborum muscle: cross-sectional observational study."

## Annex SI. Normality tests.

Table S1. Normality test

|                                     | W     | p value |
|-------------------------------------|-------|---------|
| #                                   |       |         |
| Weight                              | 0.057 | 0.845   |
| Height                              | 0.068 | 0.597   |
| Body Mass Index                     | 0.059 | 0.813   |
| Neutral axillary circumference      | 0.093 | 0.156   |
| Neutral xiphoid circumference       | 0.111 | 0.038   |
| Neutral abdominal circumference     | 0.110 | 0.039   |
| Inspiration axillary circumference  | 0.085 | 0.253   |
| Axillary expiratory circumference   | 0.100 | 0.088   |
| Inspirational xiphoid circumference | 0.125 | 0.010   |
| Expiratory xiphoid circumference    | 0.092 | 0.159   |
| Inspiration abdominal circumference | 0.099 | 0.094   |
| Abdominal expiratory circumference  | 0.091 | 0.179   |

| #                                                                    | W     | p value |
|----------------------------------------------------------------------|-------|---------|
| Chest-triceps skinfolds thickness                                    | 0.095 | 0.137   |
| Abdomen-iliac crest skinfolds thickness                              | 0.180 | 0.000   |
| Thigh skinfolds thickness                                            | 0.086 | 0.241   |
| fat percentage                                                       | 0.080 | 0.354   |
| Right L2 without compression: skin-lumbar iliocostal upper border    | 0.292 | 0.000   |
| Right L2 without compression: lumbar iliocostal skin-inferior border | 0.325 | 0.000   |
| Right L2 without compression: skin-kidney                            | 0.328 | 0.000   |
| Right L2 with compression: skin-lumbar iliocostal upper border       | 0.303 | 0.000   |
| Right L2 with compression: lumbar iliocostal skin-lower edge         | 0.335 | 0.000   |
| Right L2 with compression: skin-kidney                               | 0.333 | 0.000   |
| Left L2 without compression: skin-lumbar iliocostal upper border     | 0.274 | 0.000   |
| Left L2 without compression: lumbar iliocostal skin-inferior border  | 0.309 | 0.000   |
| Left L2 without compression: skin-kidney                             | 0.320 | 0.000   |
| Left L2 with compression: skin-lumbar iliocostal upper border        | 0.306 | 0.000   |
| Left L2 with compression: lumbar iliocostal skin-lower edge          | 0.333 | 0.000   |

| #                                                                    | W     | p value |
|----------------------------------------------------------------------|-------|---------|
| Left L2 with compression: skin-kidney                                | 0.334 | 0.000   |
| Right L4 without compression: skin-lumbar iliocostal upper border    | 0.278 | 0.000   |
| Right L4 without compression: lumbar iliocostal skin-inferior border | 0.309 | 0.000   |
| Right L4 without compression: skin-peritoneum                        | 0.308 | 0.000   |
| Right L4 with compression: skin-lumbar iliocostal upper border       | 0.300 | 0.000   |
| Right L4 with compression: lumbar iliocostal skin-inferior border    | 0.316 | 0.000   |
| Right L4 with compression: skin-peritoneum                           | 0.320 | 0.000   |
| Left L4 without compression: skin-lumbar iliocostal upper border     | 0.281 | 0.000   |
| Left L4 without compression: lumbar iliocostal skin-inferior border  | 0.324 | 0.000   |
| Left L4 without compression: skin-peritoneum                         | 0.327 | 0.000   |
| Left L4 with compression: skin-lumbar iliocostal upper border        | 0.314 | 0.000   |
| Left L4 with compression: lumbar iliocostal skin-inferior border     | 0.329 | 0.000   |
| Left L4 with compression: skin-peritoneum                            | 0.331 | 0.000   |

**Annex SII. Results depending on kind of measurements (with compression VS without compression).**

*Table S2. Results depending on kind of measurements (with VS without compression).*

|                             | P hdxuhp hqwł<br>z łkrrwł#łrp suhvłrq# | P hdxuhp hqwł<br>z łk#łrp suhvłrq# | <sup>d</sup> s#doxh# |
|-----------------------------|----------------------------------------|------------------------------------|----------------------|
| #                           |                                        |                                    |                      |
| q#                          | 99#                                    | 99#                                | #                    |
| 05#łłjkw#łnlq(nłgqh #       | 5716905613;#                           | 591:90571<8#                       | 313;:##              |
| 05#łłiw#łnlq(nłgqh #        | 57144055189#                           | 5813;0561;8#                       | 3178#                |
| 07#łłjkw#łnlq(shułwłrqhxp # | 5:1790591:;#                           | 6314;05;1;3#                       | 31578#               |
| 07#łłiw#łnlq(shułwłrqhxp #  | 5;18<05:16:;#                          | 6314305;195#                       | 31987#               |

G dwdłn{ suhvvhg#łłvłłp hđq0#łwđqgdug#łhyłłwłrq:

<sup>dł</sup>vłj qłłłfdqwlł#?3138:##

**Annex SIII. Regression analysis. Dominant vs. non-dominant side comparison.**

Table S3. Dominant vs. non-dominant side comparison.

| #                                                     | grp lqdqwhj#  | qrq(grp lqdqwhj# | dws#doch# |
|-------------------------------------------------------|---------------|------------------|-----------|
| q#                                                    | 9;#           | 9;#              | #         |
| 05# lkrxw#nlq#Erp suhvlrq#sshu#drfrwd#xp edu#hgjh#    | ;B40<18#      | :1<40;17;#       | 318#      |
| 05# lkrxw#nlq#Erp suhvlrq#qihulru#drfrwd#xp edu#hgjh# | 4;1;04:167#   | 4<15<04:1: :#    | 31;97#    |
| 05# lkrxw#lgqh #nlq#Erp suhvlrq#                      | 58115056156#  | 58156056113#     | 31;4;#    |
| 05# lkrxw#xp edu#drfrwd#sshu#hgjh#nlq#Erp suhvlrq#    | ;17<0;1:5#    | ;1:60<118#       | 31: :4#   |
| 05# lkrxw#xp edu#drfrwd#brz hu#hgjh#nlq#Erp suhvlrq#  | 5411504<17<#  | 531; :04<11<#    | 31:57#    |
| 05# lkrxw#lgqh #nlq#Erp suhvlrq#                      | 5:1730571<3#  | 591:7057167#     | 31964#    |
| 07# lkrxw#nlq#Erp suhvlrq#sshu#drfrwd#xp edu#hgjh#    | 441;3045114#  | <1:9044116#      | 31156#    |
| 07# lkrxw#nlq#Erp suhvlrq#qihulru#drfrwd#xp edu#hgjh# | 5519705417: # | 55135054117#     | 31<;<#    |
| 07# lkrxw#Erp suhvlrq#nlq#shulrqhxp #                 | 5;17;0591<#   | 5;17705:158#     | 31;66#    |
| 07# lkrxw#nlq#Erp suhvlrq#sshu#drfrwd#xp edu#hgjh#    | 431;80441<3#  | <1;704317;#      | 31958#    |
| 07# lkrxw#nlq#Erp suhvlrq#brz hu#drfrwd#xp edu#hgjh#  | 5711<056113#  | 5616:0551:9#     | 31976#    |
| 07# lkrxw#shulrqhxp #nlq#Erp suhvlrq#                 | 631<505<1135# | 5<1: ;05;16;#    | 3196;#    |

Gdw#h{ suhvhg#lv#p hdq0#wldggdug#ghyldvlrq#

grp lqdqwhj# qrqgrp lqdqwhj# d<sup>o</sup>s#ydoch#

#  
v<sup>o</sup>ljq<sup>o</sup>l<sup>o</sup>lfdqwhj#?3B8I#

---

**Annex SIV. Smoothed model with the dependent variable L4 without compression**

Table S4. Smoothed model with the dependent variable L4 without compression.

|                                                                                | HG I#  | gi <sub>hi</sub> # | I#     | <sup>d</sup> s†<br>ydaoh# |
|--------------------------------------------------------------------------------|--------|--------------------|--------|---------------------------|
| #                                                                              |        |                    |        |                           |
| Djh#                                                                           | 3B33#  | 6#                 | 3B33#  | 3k;:#                     |
| Erg P dvv#qgh{#                                                                | 4D4<#  | 5#                 | 5A7:#  | 3B7;#                     |
| Qhxwdd{bdu flufp ihuhqfh#                                                      | 3l;6<# | 6#                 | 4B58#  | 3B66#                     |
| Qhxwdd#degrp bddflufp ihuhqfh#                                                 | 4k:8#  | 6#                 | ;1:59# | ?3B34#                    |
| FkhwOulsfhsv#nlqirg#klnqhvv#                                                   | 4D8;#  | 6#                 | 5D45#  | 3B45#                     |
| Degrp hq(bdf# fuhw# vnlqirg#<br>wklnqhvv#                                      | 4B33#  | 6#                 | 7k8:#  | ?3B34#                    |
| Wkljk#nlqirg#klnqhvv#                                                          | 4B88#  | 6#                 | 3k46#  | 3A45#                     |
| HGI#Hihfwyh#ghjuhv#ri#iuhgrp #gi <sub>hi</sub> :<br>uhuhqfh#ghjuhv#ri#iuhgrp # |        |                    |        |                           |
| °vljqllfdqw#s?3B8:#                                                            |        |                    |        |                           |

**Annex SV. Smoothed model with the dependent variable L4 with compression.**

Table S5. Smoothed model with the dependent variable L4 with compression.

|                                             | HGI#   | gi <sub>hi</sub> # | I#      | <sup>a</sup> S†<br>ydoxh# |
|---------------------------------------------|--------|--------------------|---------|---------------------------|
| #                                           |        |                    |         |                           |
| Djh#                                        | 3B33#  | 6#                 | 3B33#   | 3k77#                     |
| Erg P dvv#qgh{#                             | 4k3: # | 6#                 | 51; :6# | 3B3<#                     |
| Qhxwdd{bdu #lufxp ihuhqfh#                  | 3B:8#  | 6#                 | 3B<<#   | 3B:6#                     |
| Qhxwdd#degrp hqdfufxp ihuhqfh#              | 4k<: # | 6#                 | 43B93#  | ?3B34#                    |
| FkhwOulsfhsv#vnlqirg#klnqhvv#               | 31;<5# | 6#                 | 5B;7#   | 3B36#                     |
| Degrp hq(bdf# fuhw# vnlqirg; klnqhvv#       | 3k96#  | 6#                 | 7B37#   | ?3B34#                    |
| Wkljk+nlqirg#klnqhvv#                       | 3B33#  | 6#                 | 3B33#   | 3B:5#                     |
| HGI#Hihfwyh#ghjuhvh#i#uhgrp I#              |        |                    |         |                           |
| gi <sub>hi</sub> #ihuhqfh#ghjuhvh#i#uhgrp # |        |                    |         |                           |
| <sup>a</sup> vljqlifdqw#s?3B8: #            |        |                    |         |                           |



**Annex SVI. Smoothed model with the dependent variable L2 without compression.**

Table S6. Smoothed model with the dependent variable L2 without compression.

|                                              | HGI#   | gi <sub>hi</sub> # | I#      | <sup>a</sup> s†<br>ydoxh# |
|----------------------------------------------|--------|--------------------|---------|---------------------------|
| #                                            |        |                    |         |                           |
| Djh#                                         | 419;5# | 6#                 | ;1;87#  | ?31334#                   |
| Erg P dvv#qgh{#                              | 41686# | 6#                 | 41386#  | 313;7#                    |
| Qhxwdd{ldu flfxp ihuhqfh#                    | 31333# | 6#                 | 31333#  | 3176<#                    |
| Qhxwdd{degrp lddflfxp ihuhqfh#               | 4189;# | 6#                 | 41856#  | 31374#                    |
| Fkhvw(wlfhsv#nlqirg#klnqhvv#                 | 513;5# | 6#                 | 5;1:5#  | ?31334#                   |
| Degrp hq(lldf# fuhvw# vnqirg#klnqhvv#        | 31;<5# | 6#                 | 451<36# | ?31334#                   |
| Wkljk#nlqirg#klnqhvv#                        | 31<;#  | 6#                 | <41468# | ?31334#                   |
| HGI#iihfwyhghjuhvr i#uhhgrp #                |        |                    |         |                           |
| gi <sub>hi</sub> #iihuhqfhghjuhvr i#uhhgrp # |        |                    |         |                           |
| °vljqllfdqws?3138.3#                         |        |                    |         |                           |

**Annex SVII. Smoothed model with the dependent variable L2 with compression.**

Table S7. Smoothed model with the dependent variable L2 with compression.

|                                              | HGI#   | gi <sub>hi</sub> # | I#     | <sup>a</sup> S†<br>ydoxh# |
|----------------------------------------------|--------|--------------------|--------|---------------------------|
| #                                            |        |                    |        |                           |
| Djh#                                         | 3B33#  | 6#                 | 3B33#  | 4#                        |
| Erg P dvv#qgh{#                              | 41674# | 5#                 | 41;68# | 3B97#                     |
| Qhxwdd{bdu #flfxp ihuhqfh#                   | 31;96# | 6#                 | 4B<9#  | 3B4:#                     |
| Qhxwdd#degrp bdd#flfxp ihuhqfh#              | 41<95# | 6#                 | 431<;# | ?3B34#                    |
| FkhwQulfhsv#vnlqirg#klnqhvv#                 | 31;:7# | 6#                 | 5B:6#  | 3B3<#                     |
| Degrp hq(bdf# fuhw# vnlqirg; klnqhvv#        | 4B33#  | 6#                 | 7B::#  | ?3B34#                    |
| Wkljktvnlqirg#klnqhvv#                       | 4177:# | 6#                 | 4B4:#  | 3B;6#                     |
| HGI=Hiihfwhh#ghjuhvh#i#uhhgrp #              |        |                    |        |                           |
| gi <sub>hi</sub> #ihuhqfh#ghjuhvh#i#uhhgrp # |        |                    |        |                           |
| #                                            |        |                    |        |                           |
| °vljqllfdqw#s?3B8:#                          |        |                    |        |                           |
